# Supplementary material for: Role of Advanced Glycation End-Products and Other Ligands for AGE Receptors in Thyroid Cancer Progression
Source: MDPI journal article supplement (doi:10.3390/jcm10184084), 2021-09-10
Supplement: s1 [file s1]

**Table S1.** The etiology, characteristics, progression, diagnosis and treatment of thyroid cancers: PTC, FTC, ATC, PDTC, MTC, PTL, PTS and STCT.

| Type of thyroid cancer         | Prevalence among thyroid carcinomas                            | Oncogenes                                                                                                                       | Chromosomal rearrangements                                                                                                                                                                                                                                      | Carcinoma characteristics                                                                                                                                                                                                     | Carcinoma progression                                                                     | Diagnosis                                                                                    | Treatment                                                                                                                                      | References |
|--------------------------------|----------------------------------------------------------------|---------------------------------------------------------------------------------------------------------------------------------|-----------------------------------------------------------------------------------------------------------------------------------------------------------------------------------------------------------------------------------------------------------------|-------------------------------------------------------------------------------------------------------------------------------------------------------------------------------------------------------------------------------|-------------------------------------------------------------------------------------------|----------------------------------------------------------------------------------------------|------------------------------------------------------------------------------------------------------------------------------------------------|------------|
| Papillary thyroid cancer (PTC) | 70% – 90% of TC, often in young women and girls at adolescence | BRAF <sup>V600E</sup><br>NRAS<br>KRAS<br>EIF1AX<br>PIK3CA<br>PTEN/PHTS<br>SPOP <sup>SCR3</sup><br>TP53<br>TERT <sup>C228T</sup> | RET with:<br>ACBD5,<br>AFAP1L2,<br>AKAP13,<br>ANKRD2,<br>PTC1, DLG5,<br>ERC1,<br>FKBP15, PTC5,<br>HOOK3,<br>KIAA1468,<br>PTC8, PTC3,<br>PCM1, PTC2,<br>RUFY2,<br>SPECC1L,<br>TBL1XR1,<br>SQSTM1,<br>PTC6, TRIM27,<br>PTC7 or<br>UEVLD<br><br>PAX8 with<br>PPARG | tumor: irregular borderline, surrounded by capsule, tendency to express the biggest undiversified stroma among TC, prognosticates well.<br>Aggressive variants: columnar tumour, tall cell tumour, solid tumour and hobnail . | slow growth, metastases within thyroid flesh and to lymph nodes, remains iodine catching. | problematic, similar to benign tubercle of thyroid gland with papillary hyperplasia (BTN-PH) | removal of the thyroid gland along with regional lymph nodes, in the case of papillary thyroid microcarcinoma - regular USG and TSH monitoring | [1–7]      |
| Follicular thyroid             | 10% – 15% of TC,                                               | BRAF <sup>K601E</sup><br>NRAS<br>HRAS                                                                                           | PAX8 with<br>PPARG                                                                                                                                                                                                                                              | microfollicular growth or solid/trabecular: in ~                                                                                                                                                                              | slow growth, metastases to bones and                                                      | similar to an adenoma, commonly                                                              | Total resection of the one lobe with isthmus                                                                                                   | [8–15]     |

|                                    |                                                                            |                                                                                                                                                                              |                 |                                                                                                                                                               |                                                                                                                                                  |                                                                                                                                                                                                   |                                                                                                                                                                                                                                                                                                     |         |
|------------------------------------|----------------------------------------------------------------------------|------------------------------------------------------------------------------------------------------------------------------------------------------------------------------|-----------------|---------------------------------------------------------------------------------------------------------------------------------------------------------------|--------------------------------------------------------------------------------------------------------------------------------------------------|---------------------------------------------------------------------------------------------------------------------------------------------------------------------------------------------------|-----------------------------------------------------------------------------------------------------------------------------------------------------------------------------------------------------------------------------------------------------------------------------------------------------|---------|
| carcinoma (FTC)                    | more aggressive than PTC, often in women (40 – 60 years old)               | KRAS<br>EIF1AX<br>PIK <sub>3</sub> CA<br>PTEN/PHT<br>S<br>DICER1<br>EZH1 <sup>Q571R</sup><br>EZH1 <sup>Y642F</sup><br>EZH1 <sup>M349L</sup><br>TP53<br>TERT <sup>C250T</sup> |                 | 80% of FTC cases; follicles containing colloid: in 20% of FTC cases, usually well formed capsule with blood vessels                                           | lungs, it is iodine-catching, more expansive invasion of capsule and extension of FTC into thyroid flesh - higher metastases rate and death rate | diagnosed without precise assessment of lesion's malignancy, diagnosis stated on the basis of USG with aimed biopsy is difficult. Sign of malignancy: the invasion to vessels and tumour capsule. | with removal of regional lymph nodes, opinions concerning. Expanse of operation are disparat. Lowering of operation expanse - lower risk of complications. Exception acceptable to refrain from operation : autonomous tumours in scyntygraphy, small follicular tubercles, controlled by biopsies. |         |
| Anaplastic thyroid carcinoma (ATC) | less than 2% of TC, 50% of mortality in TC, most frequently in the elderly | TP53<br>BRAF <sup>V600E</sup><br>NRAS<br>HRAS<br>KRAS<br>EIF1AX<br>PIK <sub>3</sub> CA<br>TERT <sup>C250T</sup>                                                              | PAX8 with PPARG | the most heterogenous of TC, a broad spectrum of differentiation – tumours built by fusiform cells, pleomorphic giant cells and epithelial cells, ATC stroma: | aggressive, malignant tumour, fast metastases to distant organs, early metastases via bloodstream and lymphatic                                  | diagnosis is difficult - morphological overlapping with other cancers of anaplastic morphology, similar to: fibrosarcoma, undifferentiated                                                        | conventional treatment methods are not successful, radical surgery is often impossible, chemotherapy : doxorubicin monotherapy                                                                                                                                                                      | [16–20] |

|                                                |                                                                                                                                 |                                                                                  |                                     |                                                                                                                                                                                               |                                                                                                    |                                                                                                                                                                                                                                                                                                                     |                                                                          |         |
|------------------------------------------------|---------------------------------------------------------------------------------------------------------------------------------|----------------------------------------------------------------------------------|-------------------------------------|-----------------------------------------------------------------------------------------------------------------------------------------------------------------------------------------------|----------------------------------------------------------------------------------------------------|---------------------------------------------------------------------------------------------------------------------------------------------------------------------------------------------------------------------------------------------------------------------------------------------------------------------|--------------------------------------------------------------------------|---------|
|                                                |                                                                                                                                 |                                                                                  |                                     | changingly hyaloid, hardened or desmoplastic, well defined oncological capsule is an important prognostic factor in ATC - lengthen survival time,                                             | system, it is not iodine-catching, prognosticate s badly                                           | pleomorphic sarcoma, single fibrous tumour, angiosarcoma or rhabdomyosarcoma , potential diagnosis marker: TP53 mutation, it occurs in about 70% of ATC cases, feature specific for ATC                                                                                                                             | or multi-drug regimens                                                   |         |
| Poorly differentiated thyroid carcinoma (PDTC) | 2% – 5% of TC, in people over 60 years of age, more often in men, a poor prognosis, relapse-free time is shorter than 12 months | BRAF <sup>V600E</sup><br>NRAS<br>KRAS<br>EIF1AX<br>TP53<br>TERT <sup>C250T</sup> | RET with: TFG, PTC1, PTC3 or PPFBP2 | monomorphic cancer cells form heterogeneous structure of islet, trabecular and solid build, sometimes satellite nodes, rare colloidal tumour surrounded tightly by solid tumour with necrosis | Expansive growth and partial capsule, metastasis into regional lymph nodes and into distant organs | the majority of cell tumours exhibit poorly differentiated features, PDTC displays predominant solid, insular, or trabecular growth patterns sometimes coexist with follicular, papillary or anaplastic carcinoma component<br><br>smaller lesions of lymphocytes and dendritic cells, higher number of macrophages | surgical removal of the thyroid gland and treatment with reactive iodine | [21–25] |

|                                   |                                                                                                                   |                      |                |                                                                                                                                                                                                                                                                                                                                                                                                                                                                                                 |                                                                                                                                                                                                                                                                                                        |                                                                                                                                          |                                                                                                                                                                                                                                                                                                            |         |
|-----------------------------------|-------------------------------------------------------------------------------------------------------------------|----------------------|----------------|-------------------------------------------------------------------------------------------------------------------------------------------------------------------------------------------------------------------------------------------------------------------------------------------------------------------------------------------------------------------------------------------------------------------------------------------------------------------------------------------------|--------------------------------------------------------------------------------------------------------------------------------------------------------------------------------------------------------------------------------------------------------------------------------------------------------|------------------------------------------------------------------------------------------------------------------------------------------|------------------------------------------------------------------------------------------------------------------------------------------------------------------------------------------------------------------------------------------------------------------------------------------------------------|---------|
| Medullary thyroid carcinoma (MTC) | 5% – 10% of TC, more frequent in women, may occur in children (below than 10% of cases), prognosticate s unsurely | NRAS<br>HRAS<br>KRAS | RET with MYH13 | heterogenous cancer with differentiation of parafollicular and follicular cell lines; deriving from C cells (main source of calcitonin in the body; excrete also: carcinoembryonic antygen (CEA), amyloid, adrenocorticotropi c hormone (ACTH), katacalcin, calcitonin-gene related peptide (CGRP), somatostatin, vasoactive intestinal peptide (VIP), prostaglandins, histaminase, chromogranin A, serotonin, neurospecific enolase and melanin), occur sporadicly or can accompany congenital | tumor is hard, possesses no capsule, it is white or red, located mainly in 2/3 of back-upper part of thyroid gland, advanced cancerous lesion affect trachea, recurrent laryngeal nerve and surrounding tissues, distant metastases into: lymph nodes, liver, lungs and bones, is not iodine-catching, | round, polymorphic or fusiform cells forming nests separated from one another by connective tissue are visible in histopatological image | excision of the thyroid gland and central lymph nodes of the neck, and in the case of a tumor> 1 cm in diameter, the lateral lymphatic system of the neck is usually removed from the side of the tumor, in inoperable tumors - Isotope therapy with iodine 131, chemotherapy are complementary treatments | [26–31] |
|-----------------------------------|-------------------------------------------------------------------------------------------------------------------|----------------------|----------------|-------------------------------------------------------------------------------------------------------------------------------------------------------------------------------------------------------------------------------------------------------------------------------------------------------------------------------------------------------------------------------------------------------------------------------------------------------------------------------------------------|--------------------------------------------------------------------------------------------------------------------------------------------------------------------------------------------------------------------------------------------------------------------------------------------------------|------------------------------------------------------------------------------------------------------------------------------------------|------------------------------------------------------------------------------------------------------------------------------------------------------------------------------------------------------------------------------------------------------------------------------------------------------------|---------|

|                                |                                                                              |  |                 |                                                                            |                                                                                                               |                                                                                                                      |                                                                                                                                                                                                                                  |         |
|--------------------------------|------------------------------------------------------------------------------|--|-----------------|----------------------------------------------------------------------------|---------------------------------------------------------------------------------------------------------------|----------------------------------------------------------------------------------------------------------------------|----------------------------------------------------------------------------------------------------------------------------------------------------------------------------------------------------------------------------------|---------|
|                                |                                                                              |  |                 | multiple endocrine neoplasia type 2 (20- 30% of cases)                     |                                                                                                               |                                                                                                                      |                                                                                                                                                                                                                                  |         |
| Primary thyroid lymphoma (PTL) | Less than 5% of TC, more common in females (over 65 years of age)            |  | IGH with BCL2   | Causes by proliferation of B lymphocytes                                   | suspicion of thyroid lymphoma - rapidly growing mass in the neck accompanying Hashimoto inflammation,         | rare disease, difficult to diagnose, tumor: huge, unilateral mass, hypoechogenic, invading neighbouring soft tissues | treatment depends on its grade and location, low-grade lymphomas are treated with radiotherapy; high-grade lymphomas with chemotherapy. Monoclonal antibodies are also used. The surgical removal of the entire thyroid is rare. | [32–34] |
| Primary thyroid sarcoma (PTS)  | Less than 1.5% of TC, often in young adults, 4- times more frequently in men |  | BCOR with CCNB3 | clinical and pathological features are similar to sarcoma of other organs, | a painless goiter, infiltration of adjacent organs (trachea or esophagus), metastatic invasion of local lymph | diagnostic rarity - difficulties in setting the correct diagnosis,                                                   | adjuvant chemotherapy before surgery or radiotherapy, a broad spectrum of treatment strategies: surgery, with or without additional                                                                                              | [35–37] |

|                                        |                                                                                                         |  |  |                                   |                                                                                                                  |                                                                                    |                                                                                                                                          |         |
|----------------------------------------|---------------------------------------------------------------------------------------------------------|--|--|-----------------------------------|------------------------------------------------------------------------------------------------------------------|------------------------------------------------------------------------------------|------------------------------------------------------------------------------------------------------------------------------------------|---------|
|                                        |                                                                                                         |  |  |                                   | nodes, distal metastases                                                                                         |                                                                                    | chemotherapy and local radiation, palliative care.                                                                                       |         |
| Squamous-cell thyroid carcinoma (SCTC) | Less than 1 % of TC, often in women (over 60 years of age), very aggressive tumor with a poor prognosis |  |  | differentiated, poorly understood | a primary or secondary disease, rich vascular nature but low the incidence of metastatic thyroid disease (2-3%), | radiological imaging from the neck to the abdomen (to exclude secondary diseases), | surgical resection of the tumor with adjuvant radiotherapy and chemotherapy is the recommended option – often resistant to radiotherapy, | [38,39] |

1. Bouchard, J.J.; Otero, J.H.; Scott, D.C.; Szulc, E.; Martin, E.W.; Sabri, N.; Granata, D.; Marzahn, M.R.; Lindorff-Larsen, K.; Salvatella, X.; et al. Cancer Mutations of the Tumor Suppressor SPOP Disrupt the Formation of Active, Phase-Separated Compartments. *Mol. Cell* **2018**, *72*, 19-36.e8, doi:10.1016/j.molcel.2018.08.027.
2. Gonzalez-Gonzalez, R.; Bologna-Molina, R.; Carreon-Burciaga, R.G.; Gómezpalacio-Gastelum, M.; Molina-Frechero, N.; Salazar-Rodríguez, S. Papillary Thyroid Carcinoma: Differential Diagnosis and Prognostic Values of Its Different Variants: Review of the Literature. *ISRN Oncol.* **2011**, *2011*, 1–9, doi:10.5402/2011/915925.
3. Nath, M.C.; Erickson, L.A. Aggressive Variants of Papillary Thyroid Carcinoma: Hobnail, Tall Cell, Columnar, and Solid. *Adv. Anat. Pathol.* **2018**, *25*, 172–179, doi:10.1097/PAP.0000000000000184.
4. Qiu, Z.L.; Shen, C.T.; Sun, Z.K.; Wei, W.J.; Zhang, X.Y.; Song, H.J.; Luo, Q.Y. Circulating Long Non-Coding RNAs Act as Biomarkers for Predicting 131 I Uptake and Mortality in Papillary Thyroid Cancer Patients with Lung Metastases. *Cell. Physiol. Biochem.* **2016**, *40*, 1377–1390, doi:10.1159/000453190.
5. Levy, R.A.; Hui, V.W.; Sood, R.; Fish, S.; Markowitz, A.J.; Wong, R.J.; Guillem, J.G. Cribriform-morular variant of papillary thyroid

carcinoma: an indication to screen for occult FAP. *Fam. Cancer* **2014**, *13*, 547–551, doi:10.1007/s10689-014-9732-5.

6. Laforga, J.B.; Pedro, T.; Gasent, J.M. Pulmonary metastasis of cribriform-morular variant of thyroid carcinoma mimicking primary adenocarcinoma of the lung: A potential pitfall. *Diagn. Cytopathol.* **2020**, *48*, 78–81, doi:10.1002/dc.24312.
7. Santoro, M.; Moccia, M.; Federico, G.; Carlomagno, F. RET Gene Fusions in Malignancies of the Thyroid and Other Tissues., doi:10.3390/genes11040424.
8. Poller, D.N.; Megadmi, H.; Ward, M.J.A.; Trimboli, P. Hürthle cells on fine-needle aspiration cytology are important for risk assessment of focally pet/ct fdg avid thyroid nodules. *Cancers (Basel)*. **2020**, *12*, 1–9, doi:10.3390/cancers12123544.
9. Jung, S.H.; Kim, M.S.; Jung, C.K.; Park, H.C.; Kim, S.Y.; Liu, J.; Bae, J.S.; Lee, S.H.; Kim, T.M.; Lee, S.H.; et al. Mutational burdens and evolutionary ages of thyroid follicular adenoma are comparable to those of follicular carcinoma. *Oncotarget* **2016**, *7*, 69638–69648, doi:10.18632/oncotarget.11922.
10. Baloch, Z.W.; LiVolsi, V.A. Follicular-patterned lesions of the thyroid: The bane of the pathologist. *Am. J. Clin. Pathol.* 2002, *117*, 143–150.
11. Gupta, N.; Dasyam, A.K.; Carty, S.E.; Nikiforova, M.N.; Otori, N.P.; Armstrong, M.; Yip, L.; LeBeau, S.O.; McCoy, K.L.; Coyne, C.; et al. RAS mutations in thyroid FNA specimens are highly predictive of predominantly low-risk follicular-pattern cancers. *J. Clin. Endocrinol. Metab.* **2013**, *98*, doi:10.1210/jc.2012-3396.
12. Follicular carcinoma of the thyroid: an evaluation of the histologic criteria used for diagnosis - PubMed Available online: <https://pubmed.ncbi.nlm.nih.gov/6877876/> (accessed on Mar 10, 2021).
13. Dratwa, M.; Wysoczańska, B.; Łacina, P.; Kubik, T.; Bogunia-Kubik, K. TERT—Regulation and Roles in Cancer Formation. *Front. Immunol.* 2020, *11*.
14. Ravella, L.; Lopez, • J; Descotes, • F; Gai, • J; Lapras, • V; Denier, M.-L.; Borson-Chazot, • F; Lifante, J.-C.; Decaussin-Petrucci, • M; Decaussin-Petrucci, M. Preoperative Role of RAS or BRAF K601E in the Guidance of Surgery for Indeterminate Thyroid Nodules. *World J. Surg.* **2020**, *44*, 2264–2271, doi:10.1007/s00268-020-05487-1.
15. Calebiro, D.; Grassi, E.S.; Eszlinger, M.; Ronchi, C.L.; Godbole, A.; Bathon, K.; Guizzardi, F.; De Filippis, T.; Krohn, K.; Jaeschke, H.; et al. Recurrent EZH1 mutations are a second hit in autonomous thyroid adenomas. *J. Clin. Invest.* **2016**, *126*, 3383–3388, doi:10.1172/JCI84894.
16. Thyroid gland undifferentiated (anaplastic) carcinoma (Concept Id: C0238461) - MedGen - NCBI Available online:

<https://www.ncbi.nlm.nih.gov/medgen/116064> (accessed on Mar 10, 2021).

17. Yin, Y.; Hong, S.; Yu, S.; Huang, Y.; Chen, S.; Liu, Y.; Zhang, Q.; Li, Y.; Xiao, H. MiR-195 Inhibits Tumor Growth and Metastasis in Papillary Thyroid Carcinoma Cell Lines by Targeting CCND1 and FGF2. *Int. J. Endocrinol.* **2017**, 2017, doi:10.1155/2017/6180425.
18. Ricarte-Filho, J.C.; Ryder, M.; Chitale, D.A.; Rivera, M.; Heguy, A.; Ladanyi, M.; Janakiraman, M.; Solit, D.; Knauf, J.A.; Tuttle, R.M.; et al. Mutational profile of advanced primary and metastatic radioactive iodine-refractory thyroid cancers reveals distinct pathogenetic roles for BRAF, PIK3CA, and AKT1. *Cancer Res.* **2009**, 69, 4885–4893, doi:10.1158/0008-5472.CAN-09-0727.
19. Hou, P.; Ji, M.; Xing, M. Association of PTEN gene methylation with genetic alterations in the phosphatidylinositol 3-kinase/AKT signaling pathway in thyroid tumors. *Cancer* **2008**, 113, 2440–2447, doi:10.1002/cncr.23869.
20. Donehower, L.A.; Soussi, T.; Korkut, A.; Liu, Y.; Schultz, A.; Cardenas, M.; Li, X.; Babur, O.; Hsu, T.K.; Lichtarge, O.; et al. Integrated Analysis of TP53 Gene and Pathway Alterations in The Cancer Genome Atlas. *Cell Rep.* **2019**, 28, 1370-1384.e5, doi:10.1016/j.celrep.2019.07.001.
21. Ibrahimasic, T.; Ghossein, R.; Shah, J.P.; Ganly, I. Poorly Differentiated Carcinoma of the Thyroid Gland: Current Status and Future Prospects. *Thyroid* **2019**, 29, 311–321.
22. Zheng, X.; Jia, B.; Tian, X.T.; Song, X.; Wu, M.L.; Kong, Q.Y.; Li, H.; Liu, J. Correlation of reactive oxygen species levels with resveratrol sensitivities of anaplastic thyroid cancer cells. *Oxid. Med. Cell. Longev.* **2018**, 2018, doi:10.1155/2018/6235417.
23. Ugolini, C.; Basolo, F.; Proietti, A.; Vitti, P.; Elisei, R.; Miccoli, P.; Toniolo, A. Lymphocyte and immature dendritic cell infiltrates in differentiated, poorly differentiated, and undifferentiated thyroid carcinoma. *Thyroid* **2007**, 17, 389–393, doi:10.1089/thy.2006.0306.
24. Ryder, M.; Ghossein, R.A.; Ricarte-Filho, J.C.M.; Knauf, J.A.; Fagin, J.A. Increased density of tumor-associated macrophages is associated with decreased survival in advanced thyroid cancer. *Endocr. Relat. Cancer* **2008**, 15, 1069–1074, doi:10.1677/ERC-08-0036.
25. Cherkaoui, G.S.; Guensi, A.; Taleb, S.; Idir, M.A.; Touil, N.; Benmoussa, R.; Baroudi, Z.; Chikhaoui, N. Poorly differentiated thyroid carcinoma: A retrospective clinicopathological study. *Pan Afr. Med. J.* **2015**, 21, 1937–8688, doi:10.11604/pamj.2015.21.137.6720.
26. Greco, C.; Brigante, G.; Taliani, E.; Corrado, S.; Simoni, M.; Madeo, B. Concomitant medullary thyroid carcinoma with paraganglioma-like pattern and papillary thyroid carcinoma. *Endocrinol. Diabetes Metab. Case Reports* **2019**, 2019, doi:10.1530/EDM-19-0094.
27. Accardo, G.; Conzo, G.; Esposito, D.; Gambardella, C.; Mazzella, M.; Castaldo, F.; Di Donna, C.; Polistena, A.; Avenia, N.; Colantuoni, V.;



et al. Genetics of medullary thyroid cancer: An overview. *Int. J. Surg.* 2017, 41, S2–S6.

28. Al-Rawi, M.; Wheeler, M.H. Medullary thyroid carcinoma - Update and present management controversies. *Ann. R. Coll. Surg. Engl.* 2006, 88, 433–438.
29. Owen, C.; Constantinidou, A.; Miah, A.B.; Thway, K.; Fisher, C.; Benson, C.; Zaidi, S.; Messiou, C.; Van Der Graaf, W.T.A.; Jones, R.L. Synovial sarcoma of the thyroid gland, diagnostic pitfalls and clinical management. *Anticancer Res.* **2018**, 38, 5275–5282, doi:10.21873/anticancer.12853.
30. Sharma, A.; Kaur, S.; Sarkar, M.; Sarin, B.C.; Changotra, H. The AGE-RAGE Axis and RAGE Genetics in Chronic Obstructive Pulmonary Disease. *Clin. Rev. Allergy Immunol.* 2020.
31. Chmielik, E.; Rusinek, D.; Oczko-Wojciechowska, M.; Jarzab, M.; Krajewska, J.; Czarniecka, A.; Jarzab, B. Heterogeneity of Thyroid Cancer. *Pathobiology* **2018**, 85, 117–129, doi:10.1159/000486422.
32. Hamamoto, Y.; Kukita, Y.; Kitamura, M.; Kurashige, M.; Masaie, H.; Fuji, S.; Ishikawa, J.; Honma, K.; Wakasa, T.; Hanamoto, H.; et al. Bcl-2-negative IGH-BCL2 translocation-negative follicular lymphoma of the thyroid differs genetically and epigenetically from Bcl-2-positive IGH-BCL2 translocation-positive follicular lymphoma. *Histopathology* **2021**, doi:10.1111/his.14378.
33. Kesireddy, M.; Lasrado, S. *Cancer, Thyroid Lymphoma*; StatPearls Publishing, 2020;
34. Cho, J.K.; Woo, S.H.; Park, J.; Kim, M.J.; Jeong, H.S. Primary squamous cell carcinomas in the thyroid gland: An individual participant data meta-analysis. *Cancer Med.* **2014**, 3, 1396–1403, doi:10.1002/cam4.287.
35. Tan, L.-C.; Yu, P.-C.; Wang, J.; Zhou, X.-Y.; Ji, Q.-H.; Wang, Y.-L. BCOR-CCNB3 rearranged sarcoma arising in neck misdiagnosed as thyroid cancer: A case report. *Oral Oncol.* **2021**, 105290, doi:10.1016/j.oraloncology.2021.105290.
36. De Felice, F.; Moscatelli, E.; Orelli, S.; Bulzonetti, N.; Musio, D.; Tombolini, V. Primary thyroid angiosarcoma: A systematic review. *Oral Oncol.* 2018, 82, 48–52.
37. (No Title) Available online: <https://ar.iiarjournals.org/content/anticancer/35/10/5185.full.pdf> (accessed on Apr 26, 2021).
38. Wygoda, A.; Rutkowski, T.; Szcześniak-Kłusek, B.; Mrochem-Kwarciak, J.; Jędrzejewska, M.; Skłodowski, K. Primary squamous-cell thyroid carcinoma — A successful treatment with five-year follow-up. *Endokrynol. Pol.* **2017**, 68, 592–596, doi:10.5603/EP.a2017.0048.
39. Ibrahim, M.I.S.; Jusoh, Y.R.; Adam, N.N.; Mohamad, I. Primary squamous cell carcinoma of the thyroid gland. *Iran. J. Otorhinolaryngol.*

**2018**, 30, 65–68, doi:10.22038/ijorl.2017.19732.1663.
